# Supplementary material for: Pine plantations and five decades of land use change in central Chile
Source: PLOS journal article supplement (doi:10.1371/journal.pone.0230193), 2020-03-13
Supplement: S1 (10.1371/journal.pone.0230193.s001) [file journal.pone.0230193.s001]

**S1 Table.** Interpretation certainty level each year, considering percentage of points classified in the three arbitrary levels (low, medium, high).

| Year | Land use               | Certainty level (%) |        |      |
|------|------------------------|---------------------|--------|------|
|      |                        | low                 | medium | High |
| 1960 | Agricultural-livestock | 4.6                 | 37.1   | 58.3 |
|      | Native forest          | 5.4                 | 53.2   | 41.4 |
|      | Pine plantation        | 24.6                | 36.5   | 38.9 |
| 1975 | Agricultural-livestock | 34.7                | 50.8   | 14.5 |
|      | Native forest          | 40.0                | 51.1   | 8.9  |
|      | Pine plantation        | 26.4                | 35.5   | 38.1 |
| 1998 | Agricultural-livestock | 13.7                | 57.8   | 28.4 |
|      | Native forest          | 5.3                 | 50.9   | 43.9 |
|      | Pine plantation        | 9.9                 | 36.6   | 53.5 |
| 2014 | Agricultural-livestock | 0                   | 5.1    | 94.9 |
|      | Native forest          | 0                   | 1.9    | 98.1 |
|      | Pine plantation        | 0.3                 | 8.1    | 91.7 |
